# Supplementary material for: Phytochemical Investigation of Three Cystoseira Species and Their Larvicidal Activity Supported with In Silico Studies
Source: MDPI journal article supplement (doi:10.3390/md21020117), 2023-02-10
Supplement: s1 [file s1]

1. UPLC-ESI-MS analysis

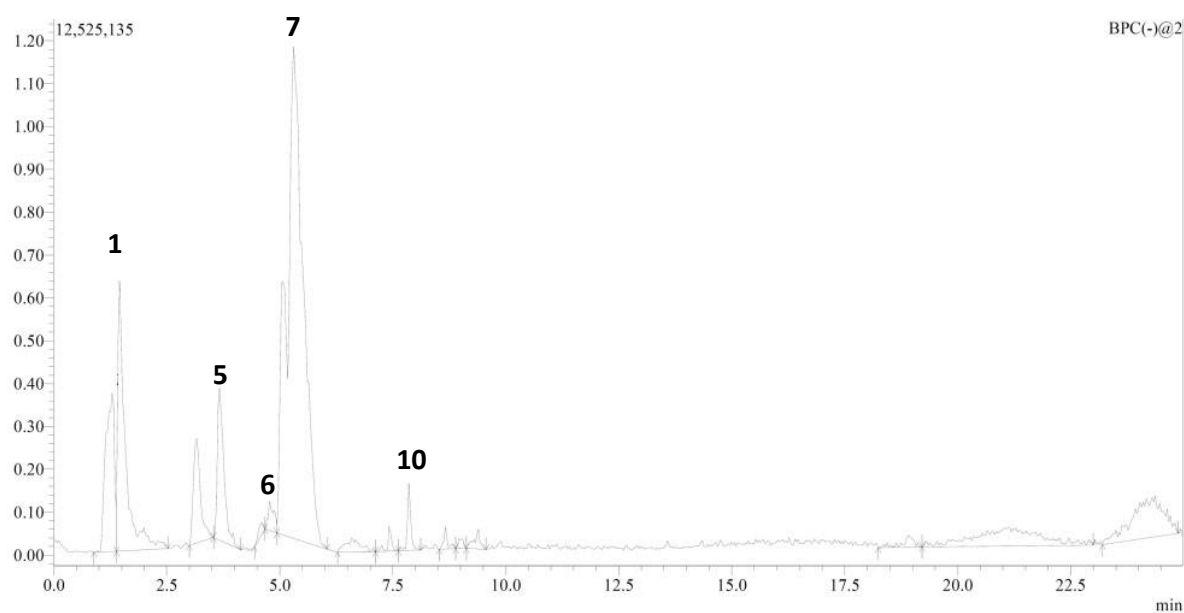

**Figure S1.** UPLC-ESI-MS base peak chromatogram of *Cystoseira myrica* total methanol extract in the negative ion mode.

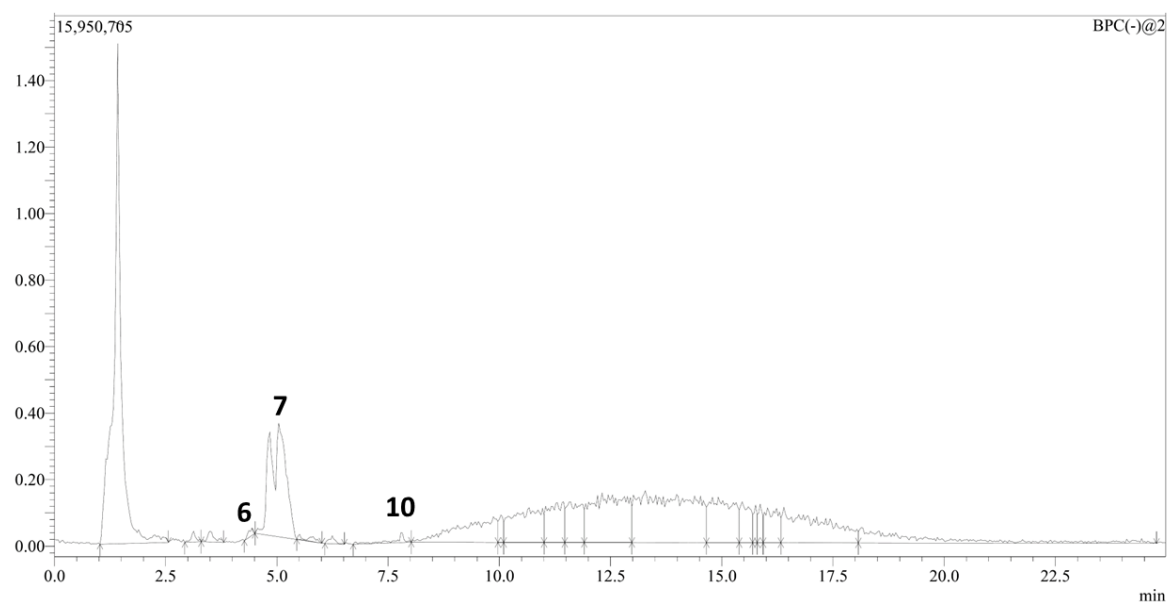

**Figure S2.** UPLC-ESI-MS base peak chromatogram of *Cystoseira trinodis* total methanol extract in the negative ion mode.

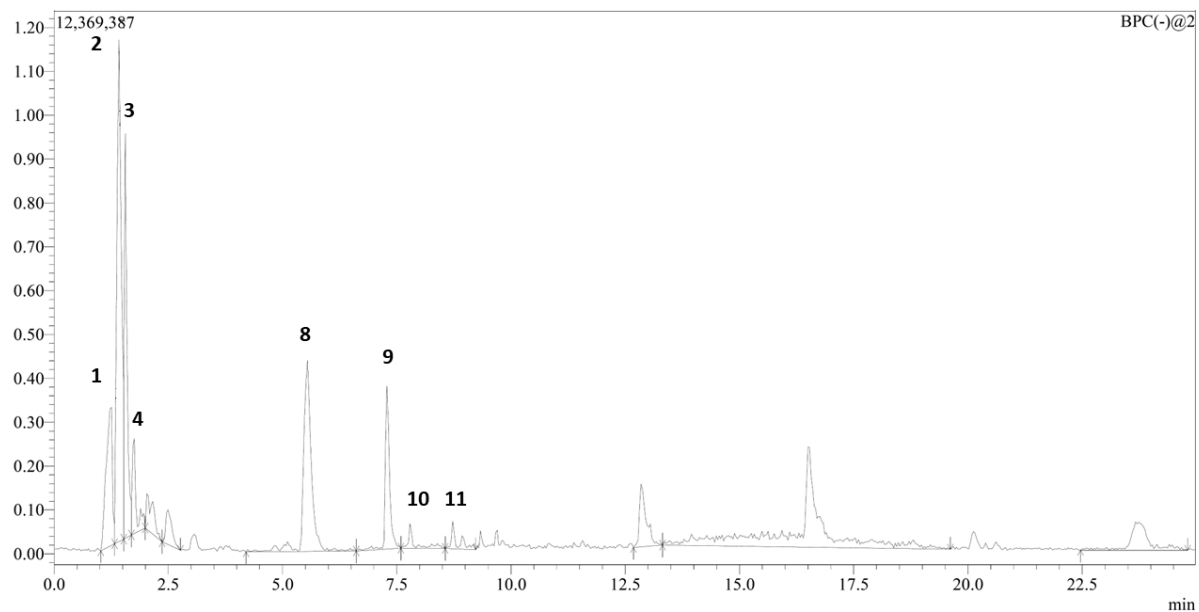

**Figure S3.** UPLC-ESI-MS base peak chromatogram of *Cystoseira tamariscifolia* total methanol extract in the negative ion mode.

## 2. Larvicidal Bioassay

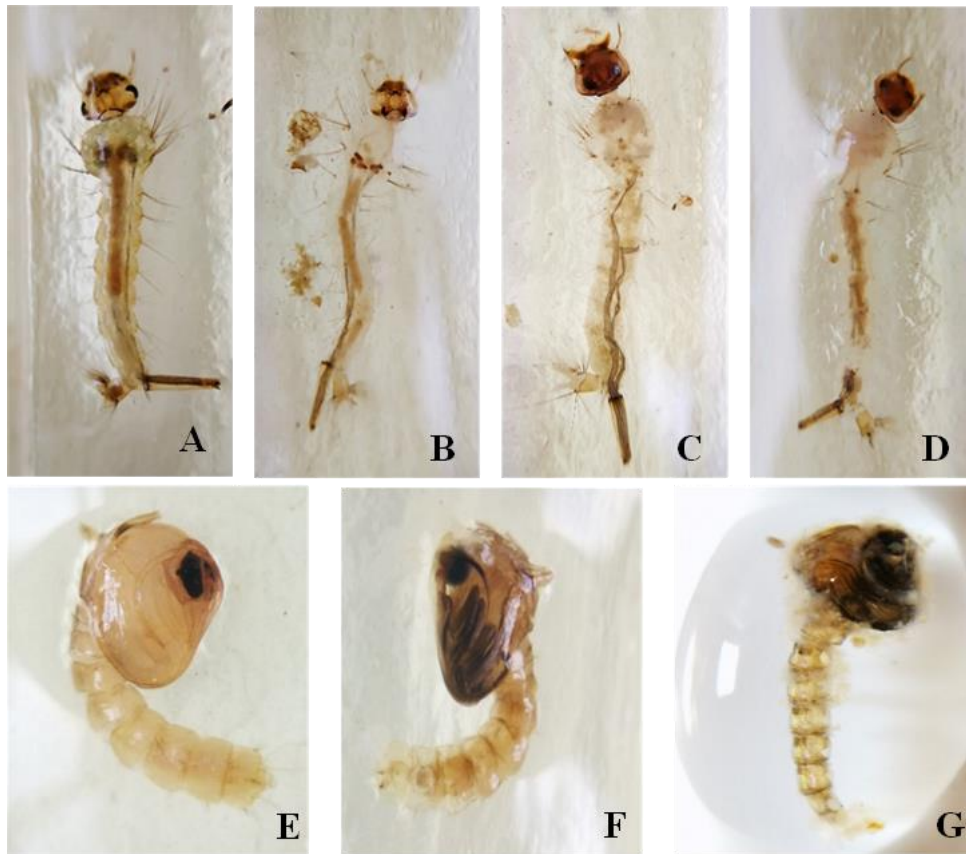

**(Figure S4).** *Culex pipiens* larvae with a fully developed head, thorax, abdomen, siphon, anal gill, and anal papillae (A). Abnormalities induced in larvae after treatment with *Cystoseira myrica*, *C. trinodis*, and *C. tamariscifolia* compounds showing damaged cuticle, muscle, and digestive system in the thorax and abdomen, and damaged larvae with loss of mouth brush, gill, and anal papillae (B-D). Control comma-shaped brown pupae with a well-developed cephalothorax (E). Abnormalities in pupae showing an elongated abdomen and darkened cephalothorax, highly pigmented cephalothorax and abdomen, and loss of gills (F, G).

### 3. In-Silico Studies

#### 3.1. Binding mode with AChE enzyme

Compound (**4**) bound strongly to Trp321 and Asp322, respectively *via* H-arene interactions. Compound (**7**) showed good binding affinities to AChE without forming any hydrogen bonds only exposure to the receptor controls their binding effectiveness. Compound (**8**) showed weak binding modes with (BE = -4.98 Kcal/mol) to the protein pocket although it could form H-arene interaction with Tyr374. This may be attributed to its small rigid structures and minor flexible functionality. Compound (**11**) showed weak binding - binding modes with (BE = -5.59Kcal/mol) (**Figure S6**).

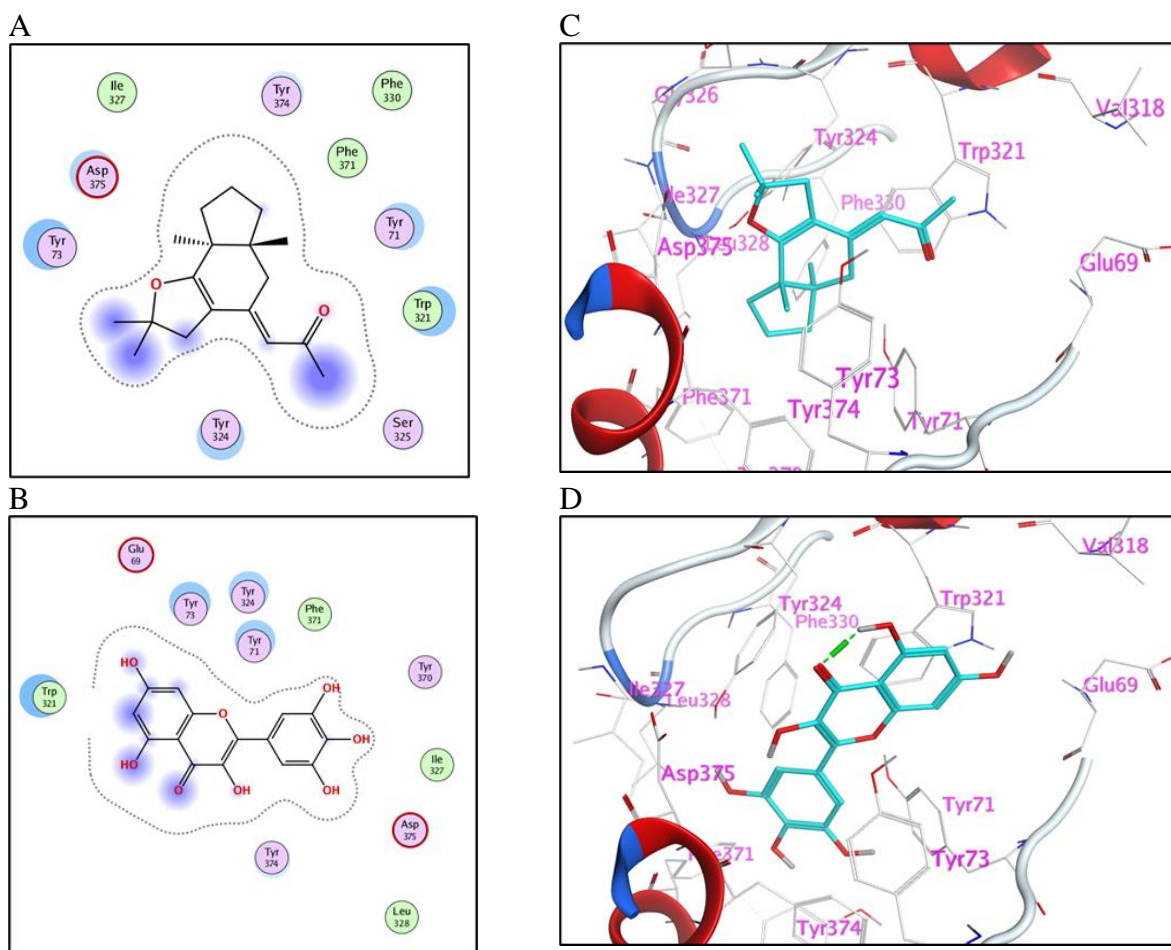

**Figure S5.** (A-C) 2D-binding interaction profile for compounds **1** and **2**, respectively, with the active pocket of AChE enzyme. (D-F) In-depth 3D ligand-AChE interaction mode for compounds **1** and **2** respectively.

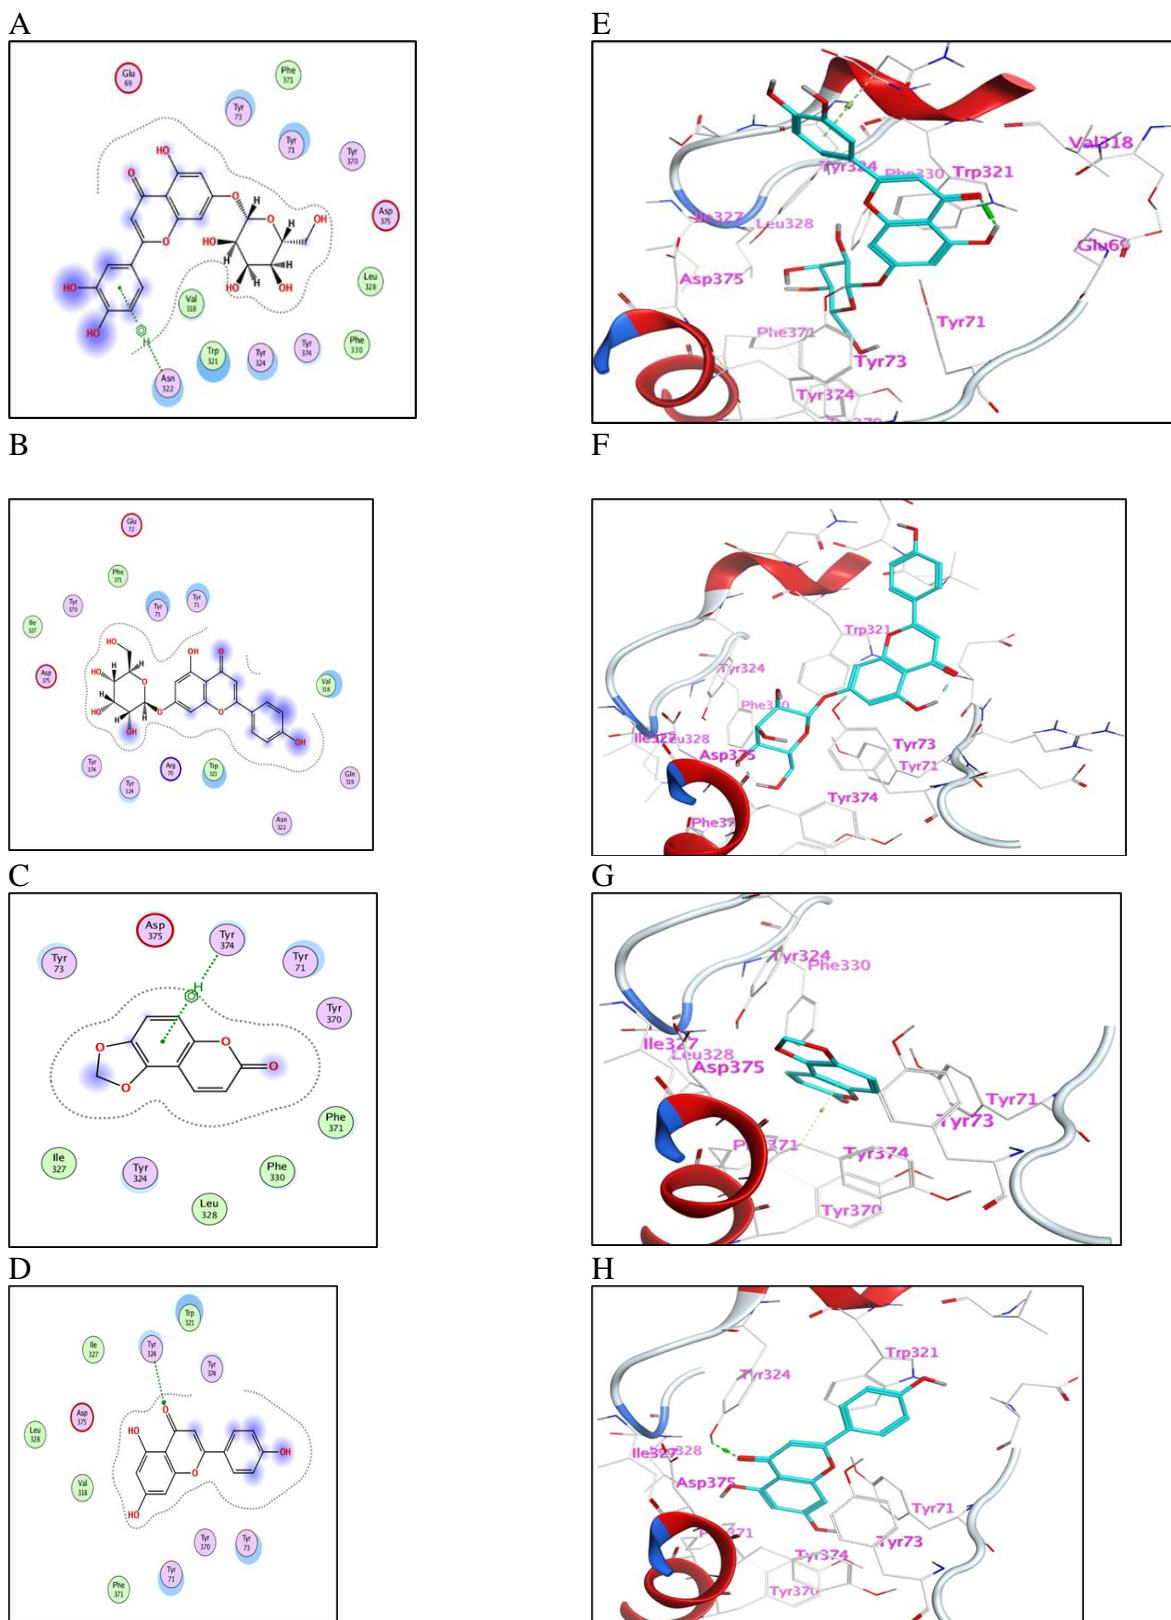

**Figure S6.** (A-D) 2D-binding interaction profile for compounds **4,7,8** and **11** respectively, with the active pocket of AChE enzyme. (E-H) In-depth 3D ligand-AChE interaction mode for compounds **4,7,8** and **11** respectively.

### 3.2. Binding mode with GST enzyme

Compounds (**1** and **8**) bind with the GST-pocket *via* forming one hydrogen bond. Among all, compound (**8**) (with Asn142) exhibited the smallest values of binding energies (-4.42 Kcal/mol) due to the same reason mentioned for binding with AChE . Besides, each of the compounds (**2**, **7** and **11**) possess two hydrogen bonds with two crucial amino acid residues. Only apigenin (**11**) formed an extra H-arene interaction with Tyr211. Four hydrogen bonds control the binding of compound (**4**) with the pocket of GST, it shares the formation of H-bonds with two crucial residues, Arg145 and Tyr208 (**Figure S7 & S8**)

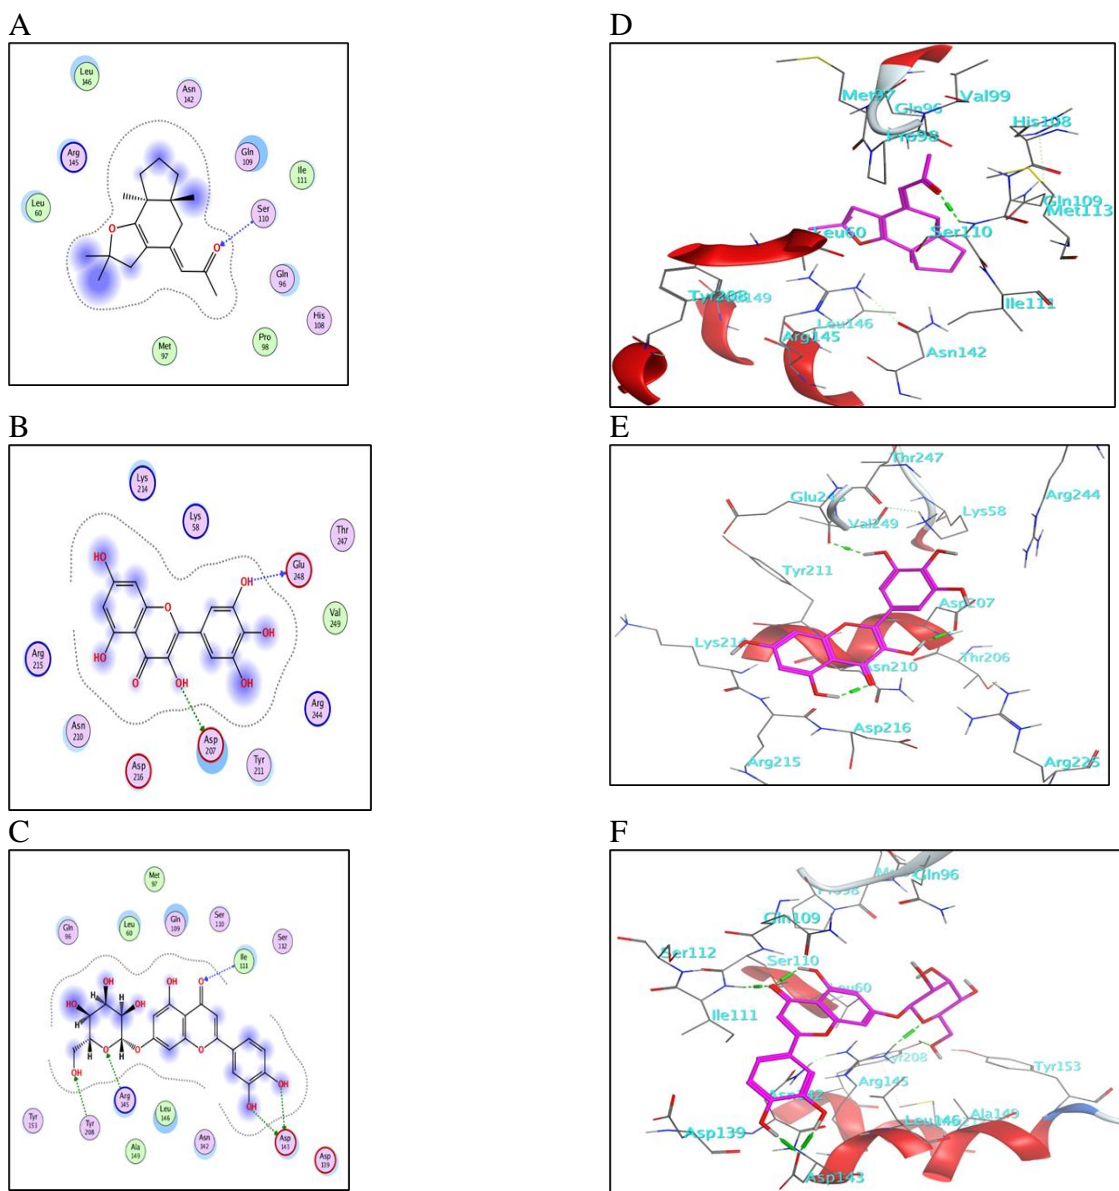

**Figure S7.** (A-C) 2D-binding interaction profile for compounds **1**, **2**, and **4**, respectively, with the active pocket of GST enzyme. (D-F) In-depth 3D ligand-GST interaction mode for compounds **1**, **2**, and **4**, respectively.





**A**

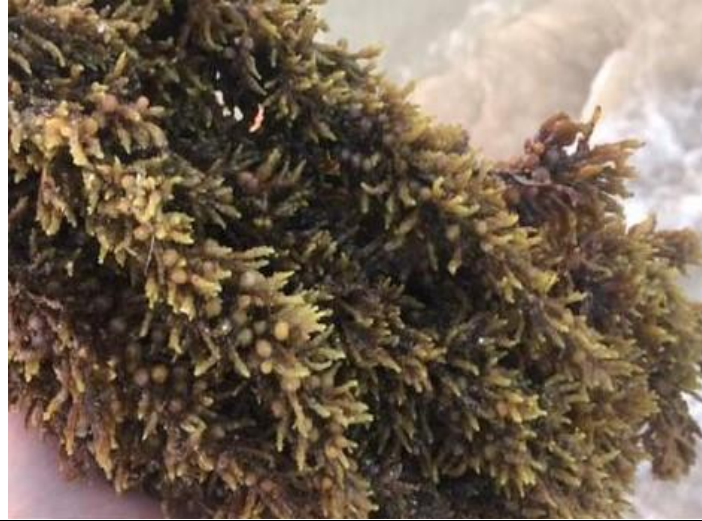

**B**

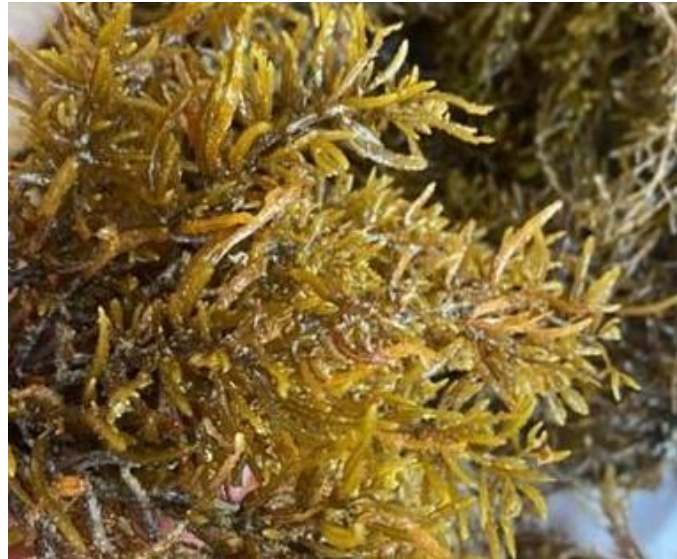

**C**

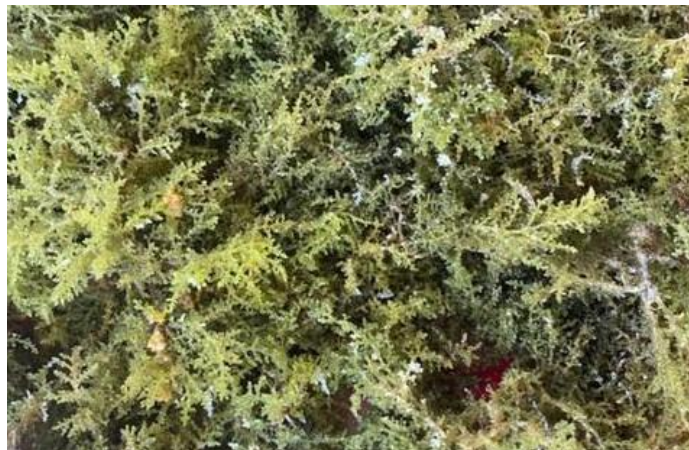

**Figure S9.** High-resolution images of the three samples of the work; **A.** *Cystoseira myrica*, **B.** *Cystoseira trinodis*, **C.** *Cystoseira tamariscifolia*.



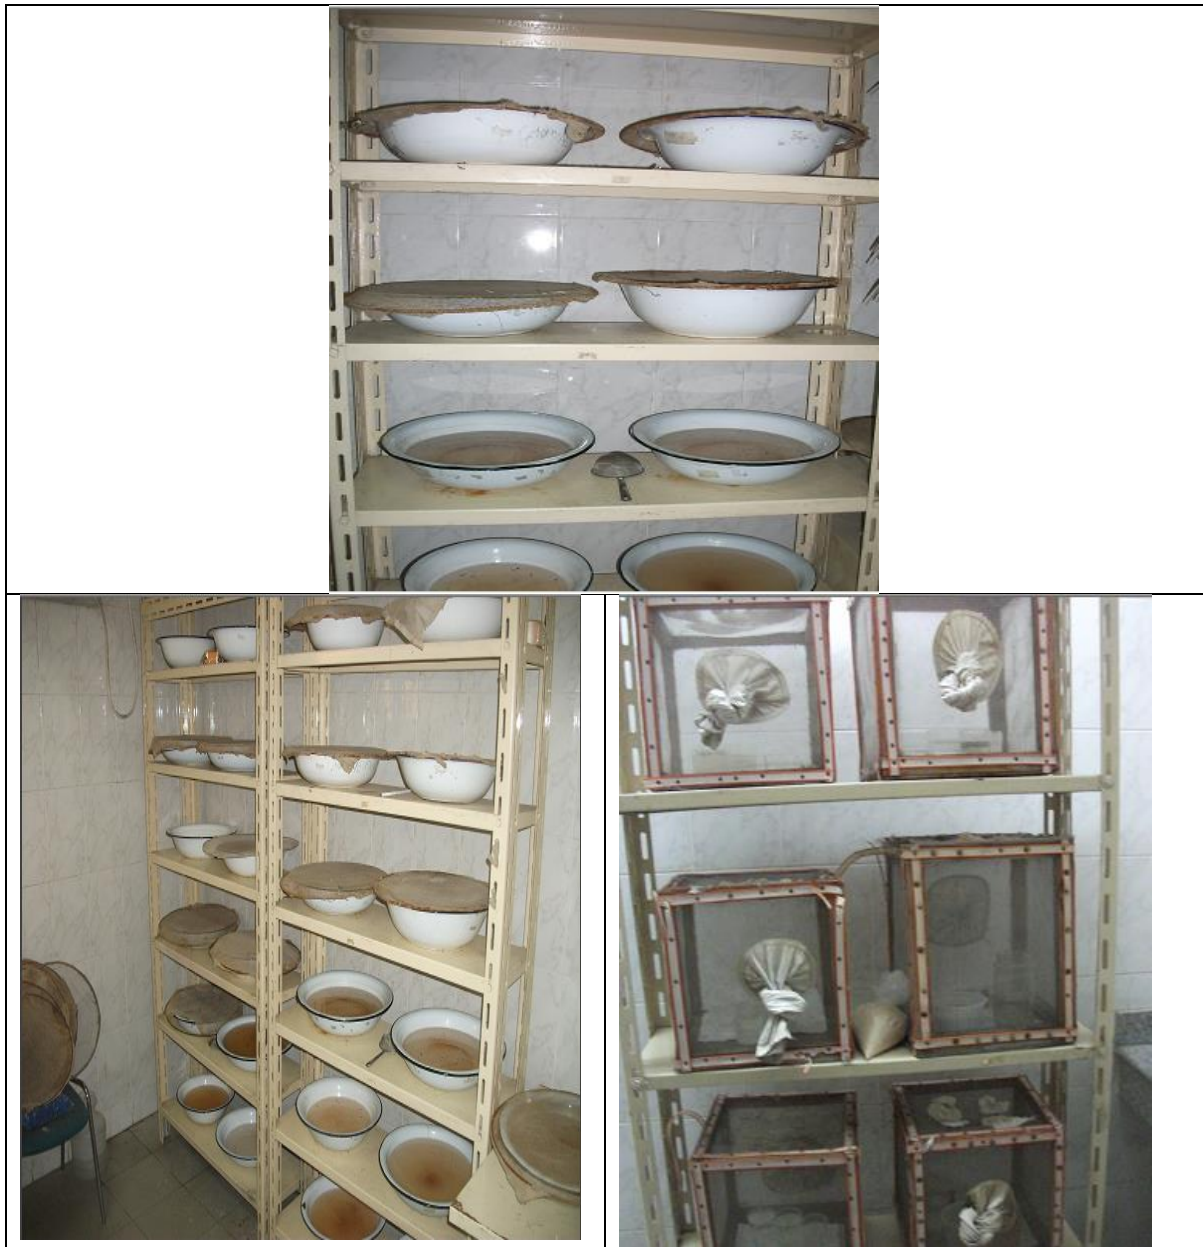

**Figure S10.** Laboratory Maintenance of *Cx. pipiens*.
